# Supplementary material for: Prenatal Nitrate Intake from Drinking Water and Selected Birth Defects in Offspring of Participants in the National Birth Defects Prevention Study
Source: PubMed Central journal article supplement (PMC3764078; doi:10.1289/ehp.1206249), 2013-06-14
Supplement: ehp.1206249.s001.pdf [file ehp.1206249.s001.pdf]

## **Supplemental Material**

### **Prenatal Nitrate Intake from Drinking Water and Selected Birth Defects in Offspring of Participants in the National Birth Defects Prevention Study**

Jean D. Brender, Peter J. Weyer, Paul A. Romitti, Binayak P. Mohanty, Mayura U. Shinde, Ann M. Vuong, Joseph R. Sharkey, Dipankar Dwivedi, Scott A. Horel, Jiji Kantamneni, John C. Huber Jr., Qi Zheng, Martha M. Werler, Katherine E. Kelley, John S. Griesenbeck, F. Benjamin Zhan, Peter H. Langlois, Lucina Suarez, Mark A. Canfield, and the National Birth Defects Prevention Study

#### **Table of Contents**

|                                                                                                                                                                                                                       | Page |
|-----------------------------------------------------------------------------------------------------------------------------------------------------------------------------------------------------------------------|------|
| Supplemental Material, Table S1. Maternal daily nitrate intake from drinking water and selected birth defects in offspring among participants who drank only tap water from municipal water supplies                  | 2    |
| Supplemental Material, Table S2. Nitrate in municipal drinking water source of tap water drinkers and selected birth defects in offspring, Iowa and Texas participants of the National Birth Defects Prevention Study | 4    |
| Supplemental Material, Table S3. Associations between nitrosatable drug use (versus no use) and birth defects according to estimated nitrate intake from drinking water during early pregnancy                        | 6    |
| Supplemental Material, Table S4. Associations between nitrosatable drug use (versus no use) and birth defects according to estimated total nitrite intake from diet and drinking water during early pregnancy         | 8    |

**Supplemental Material, Table S1.** Maternal daily nitrate intake from drinking water and selected birth defects in offspring among participants who only drank tap water from municipal water supplies

| Type of Birth defect                          | Daily nitrate intake from water <sup>a</sup> (mg/day) | Cases No. (%) | Controls No. (%) | Unadjusted OR <sup>b</sup> (95%CI) | Adjusted OR <sup>b</sup> (95%CI) | <i>p</i> -value for linear trend |
|-----------------------------------------------|-------------------------------------------------------|---------------|------------------|------------------------------------|----------------------------------|----------------------------------|
| Any neural tube defect <sup>c</sup>           | < 0.91                                                | 25 (16.7)     | 125 (18.9)       | 1.00                               | 1.00                             | 0.230                            |
|                                               | 0.91 – 4.9                                            | 38 (25.3)     | 199 (30.2)       | 0.95 (0.55, 1.66)                  | 0.91 (0.52, 1.60)                |                                  |
|                                               | ≥ 5.0                                                 | 87 (58.0)     | 336 (50.9)       | 1.29 (0.79, 2.11)                  | 1.25 (0.76, 2.06)                |                                  |
| Spina bifida <sup>c</sup>                     | < 0.91                                                | 12 (12.1)     | 125 (18.9)       | 1.00                               | 1.00                             | 0.037                            |
|                                               | 0.91 – 4.9                                            | 27 (27.3)     | 199 (30.2)       | 1.41 (0.69, 2.89)                  | 1.40 (0.68, 2.89)                |                                  |
|                                               | ≥ 5.0                                                 | 60 (60.6)     | 336 (50.9)       | 1.86 (0.97, 3.57)                  | 1.93 (0.99, 3.76)                |                                  |
| Anencephaly <sup>c</sup>                      | < 0.91                                                | 9 (24.3)      | 125 (18.9)       | 1.00                               | 1.00                             | 0.510                            |
|                                               | 0.91 – 4.9                                            | 9 (24.3)      | 199 (30.2)       | 0.63 (0.24, 1.63)                  | 0.59 (0.23, 1.56)                |                                  |
|                                               | ≥ 5.0                                                 | 19 (51.4)     | 336 (50.9)       | 0.79 (0.35, 1.78)                  | 0.69 (0.30, 1.61)                |                                  |
| Any limb deficiency <sup>d,e</sup>            | < 1.0                                                 | 4 (6.6)       | 114 (17.2)       | 1.00                               | 1.00                             | 0.030                            |
|                                               | 1.0 – 5.41                                            | 19 (31.2)     | 215 (32.4)       | 2.52 (0.84, 7.58)                  | 2.43 (0.80, 7.43)                |                                  |
|                                               | ≥ 5.42                                                | 38 (62.3)     | 335 (50.5)       | 3.23 (1.13, 9.26)                  | 3.19 (1.09, 9.35)                |                                  |
| Any oral cleft defect <sup>e,f</sup>          | < 1.0                                                 | 47 (16.9)     | 114 (17.3)       | 1.00                               | 1.00                             | 0.191                            |
|                                               | 1.0 – 5.41                                            | 74 (26.5)     | 214 (32.4)       | 0.84 (0.55, 1.29)                  | 0.80 (0.52, 1.25)                |                                  |
|                                               | ≥ 5.42                                                | 158 (56.6)    | 333 (50.4)       | 1.15 (0.78, 1.70)                  | 1.15 (0.77, 1.72)                |                                  |
| Cleft lip without cleft palate <sup>e,f</sup> | < 1.0                                                 | 8 (11.6)      | 114 (17.3)       | 1.00                               | 1.00                             | 0.022                            |
|                                               | 1.0 – 5.41                                            | 15 (21.7)     | 214 (32.4)       | 1.00 (0.41, 2.43)                  | 0.96 (0.39, 2.37)                |                                  |
|                                               | ≥ 5.42                                                | 46 (66.7)     | 333 (50.4)       | 1.97 (0.90, 4.30)                  | 1.96 (0.88, 4.36)                |                                  |
| Cleft palate <sup>e,f</sup>                   | < 1.0                                                 | 12 (15.0)     | 114 (17.3)       | 1.00                               | 1.00                             | 0.092                            |
|                                               | 1.0 – 5.41                                            | 20 (25.0)     | 214 (32.4)       | 0.89 (0.42, 1.88)                  | 0.93 (0.43, 2.02)                |                                  |
|                                               | ≥ 5.42                                                | 48 (60.0)     | 333 (50.4)       | 1.37 (0.70, 2.67)                  | 1.55 (0.78, 3.10)                |                                  |
| Conotruncal <sup>c,g</sup>                    | < 1.0                                                 | 15 (15.8)     | 114 (17.2)       | 1.00                               | 1.00                             | 0.252                            |
|                                               | 1.0 – 5.41                                            | 25 (26.3)     | 215 (32.4)       | 0.88 (0.45, 1.74)                  | 0.92 (0.46, 1.83)                |                                  |
|                                               | ≥ 5.42                                                | 55 (57.9)     | 335 (50.5)       | 1.25 (0.68, 2.29)                  | 1.29 (0.69, 2.41)                |                                  |

| Type of Birth defect                                       | Daily nitrate intake from water <sup>a</sup> (mg/day) | Cases No. (%) | Controls No. (%) | Unadjusted OR <sup>b</sup> (95%CI) | Adjusted OR <sup>b</sup> (95%CI) | <i>p</i> -value for linear trend |
|------------------------------------------------------------|-------------------------------------------------------|---------------|------------------|------------------------------------|----------------------------------|----------------------------------|
| Right ventricular outflow tract obstruction <sup>c,g</sup> | < 1.0                                                 | 9 (11.1)      | 114 (17.2)       | 1.00                               | 1.00                             | 0.076                            |
|                                                            | 1.0 – 5.41                                            | 24 (29.6)     | 215 (32.4)       | 1.41 (0.64, 3.14)                  | 1.46 (0.65, 3.28)                |                                  |
|                                                            | ≥ 5.42                                                | 48 (59.3)     | 335 (50.5)       | 1.81 (0.86, 3.82)                  | 1.90 (0.89, 4.01)                |                                  |
| Left ventricular outflow tract obstruction <sup>c,g</sup>  | < 1.0                                                 | 17 (17.4)     | 114 (17.2)       | 1.00                               | 1.00                             | 0.944                            |
|                                                            | 1.0 – 5.42                                            | 33 (33.7)     | 215 (32.4)       | 1.03 (0.55, 1.93)                  | 1.12 (0.60, 2.12)                |                                  |
|                                                            | > 5.42                                                | 48 (49.0)     | 335 (50.5)       | 0.96 (0.53, 1.74)                  | 1.06 (0.58, 1.92)                |                                  |
| Septal defects <sup>c,g</sup>                              | < 1.0                                                 | 55 (17.8)     | 114 (17.2)       | 1.00                               | 1.00                             | 0.311                            |
|                                                            | 1.0 – 5.42                                            | 117 (37.9)    | 215 (32.4)       | 1.13 (0.76, 1.67)                  | 1.09 (0.72, 1.63)                |                                  |
|                                                            | > 5.42                                                | 137 (44.3)    | 335 (50.5)       | 0.85 (0.58, 1.24)                  | 0.87 (0.59, 1.30)                |                                  |

<sup>a</sup> For neural tube defects, water nitrate intake one month preconception to one month post-conception was estimated. For limb, oral cleft and congenital heart defects, water nitrate intake during one month preconception through the first trimester was estimated.

<sup>b</sup> Crude and adjusted odds ratio include only cases and controls with complete information for covariates.

<sup>c</sup> Adjusted for maternal race/ethnicity, education, study center and folic acid supplementation.

<sup>d</sup> Adjusted for maternal race/ethnicity, education, age, multivitamin supplementation, and study center.

<sup>e</sup> Isolated defect

<sup>f</sup> Adjusted for maternal race/ethnicity, education, age, folic acid supplementation during the first trimester, maternal smoking, and study center.

<sup>g</sup> Adjusted for maternal race/ethnicity, education, multivitamin use during the first trimester, maternal smoking, and study center.

**Supplemental Material, Table S2.** Nitrate in municipal drinking water source of tap water drinkers<sup>a</sup> and selected birth defects in offspring, Iowa and Texas participants of the National Birth Defects Prevention Study

| Type of birth defect                          | Nitrate <sup>b</sup><br>(mg/L) | Cases<br>No. (%) | Controls<br>No. (%) | Unadjusted OR <sup>c</sup><br>(95% CI) | Adjusted OR <sup>c</sup><br>(95% CI) | <i>p</i> -value for<br>linear trend |
|-----------------------------------------------|--------------------------------|------------------|---------------------|----------------------------------------|--------------------------------------|-------------------------------------|
| Any neural tube defect <sup>d</sup>           | < 5.0                          | 67 (43.2)        | 353 (51.6)          | 1.00                                   | 1.00                                 | 0.794                               |
|                                               | 5.0–15.0                       | 72 (46.5)        | 205 (30.0)          | 1.85 (1.27, 2.69)                      | 1.82 (1.24, 2.67)                    |                                     |
|                                               | > 15.0                         | 16 (10.3)        | 126 (18.4)          | 0.67 (0.37, 1.20)                      | 0.66 (0.36, 1.21)                    |                                     |
| Spina bifida <sup>d</sup>                     | < 5.0                          | 40 (38.8)        | 353 (51.6)          | 1.00                                   | 1.00                                 | 0.501                               |
|                                               | 5.0–15.0                       | 52 (50.5)        | 205 (30.0)          | 2.24 (1.43, 3.50)                      | 2.42 (1.52, 3.84)                    |                                     |
|                                               | > 15.0                         | 11 (10.7)        | 126 (18.4)          | 0.77 (0.38, 1.55)                      | 0.69 (0.33, 1.42)                    |                                     |
| Anencephaly <sup>d</sup>                      | < 5.0                          | 20 (52.6)        | 353 (51.6)          | 1.00                                   | 1.00                                 | 0.736                               |
|                                               | 5.0–15.0                       | 13 (34.2)        | 205 (30.0)          | 1.12 (0.55, 2.30)                      | 0.92 (0.44, 1.93)                    |                                     |
|                                               | > 15.0                         | 5 (13.2)         | 126 (18.4)          | 0.70 (0.26, 1.91)                      | 0.85 (0.29, 2.49)                    |                                     |
| Any limb deficiency <sup>e,f</sup>            | < 5.0                          | 28 (44.4)        | 337 (48.8)          | 1.00                                   | 1.00                                 | 0.329                               |
|                                               | 5.0–15.0                       | 23 (36.5)        | 229 (33.2)          | 1.21 (0.68, 2.15)                      | 1.08 (0.59, 1.99)                    |                                     |
|                                               | > 15.0                         | 12 (19.1)        | 124 (18.0)          | 1.16 (0.57, 2.36)                      | 1.53 (0.71, 3.33)                    |                                     |
| Any oral cleft defect <sup>f,g</sup>          | < 5.0                          | 127 (44.9)       | 335 (48.8)          | 1.00                                   | 1.00                                 | 0.269                               |
|                                               | 5.0–15.0                       | 109 (38.5)       | 229 (33.3)          | 1.26 (0.92, 1.71)                      | 1.22 (0.89, 1.68)                    |                                     |
|                                               | > 15.0                         | 47 (16.6)        | 123 (17.9)          | 1.01 (0.68, 1.49)                      | 1.18 (0.78, 1.79)                    |                                     |
| Cleft lip without cleft palate <sup>f,g</sup> | < 5.0                          | 29 (40.3)        | 335 (48.8)          | 1.00                                   | 1.00                                 | 0.026                               |
|                                               | 5.0–15.0                       | 22 (30.6)        | 229 (33.3)          | 1.11 (0.62, 1.98)                      | 1.07 (0.59, 1.96)                    |                                     |
|                                               | > 15.0                         | 21 (29.2)        | 123 (17.9)          | 1.97 (1.08, 3.59)                      | 2.31 (1.20, 4.47)                    |                                     |
| Cleft palate <sup>f,g</sup>                   | < 5.0                          | 32 (40.0)        | 335 (48.8)          | 1.00                                   | 1.00                                 | 0.344                               |
|                                               | 5.0–15.0                       | 36 (45.0)        | 229 (33.3)          | 1.65 (0.99, 2.73)                      | 1.75 (1.03, 2.98)                    |                                     |
|                                               | > 15.0                         | 12 (15.0)        | 123 (17.9)          | 1.02 (0.51, 2.05)                      | 1.10 (0.52, 2.29)                    |                                     |

| Type of birth defect                                          | Nitrate <sup>b</sup><br>(mg/L) | Cases<br>No. (%) | Controls<br>No. (%) | Unadjusted OR <sup>c</sup><br>(95% CI) | Adjusted OR <sup>c</sup><br>(95% CI) | <i>p</i> -value for<br>linear trend |
|---------------------------------------------------------------|--------------------------------|------------------|---------------------|----------------------------------------|--------------------------------------|-------------------------------------|
| Conotruncal heart<br>defects <sup>f,h</sup>                   | < 5.0                          | 50 (49.0)        | 337 (48.8)          | 1.00                                   | 1.00                                 | 0.536                               |
|                                                               | 5.0–15.0                       | 39 (38.2)        | 229 (33.2)          | 1.15 (0.73, 1.80)                      | 1.15 (0.72, 1.83)                    |                                     |
|                                                               | > 15.0                         | 13 (12.8)        | 124 (18.0)          | 0.71 (0.37, 1.35)                      | 0.70 (0.35, 1.37)                    |                                     |
| Right ventricular outflow<br>tract obstruction <sup>f,h</sup> | < 5.0                          | 33 (39.3)        | 337 (48.8)          | 1.00                                   | 1.00                                 | 0.210                               |
|                                                               | 5.0–15.0                       | 32 (38.1)        | 229 (33.2)          | 1.43 (0.85, 2.39)                      | 1.44 (0.83, 2.51)                    |                                     |
|                                                               | > 15.0                         | 19 (22.6)        | 124 (18.0)          | 1.56 (0.86, 2.85)                      | 1.41 (0.74, 2.70)                    |                                     |
| Left ventricular outflow<br>tract obstruction <sup>f,h</sup>  | < 5.0                          | 44 (44.4)        | 337 (48.8)          | 1.00                                   | 1.00                                 | 0.278                               |
|                                                               | 5.0–15.0                       | 30 (30.3)        | 229 (33.2)          | 1.00 (0.61, 1.64)                      | 1.12 (0.67, 1.86)                    |                                     |
|                                                               | > 15.0                         | 25 (25.3)        | 124 (18.0)          | 1.54 (0.91, 2.63)                      | 1.37 (0.78, 2.39)                    |                                     |
| Septal defects <sup>f,h</sup>                                 | < 5.0                          | 201 (62.8)       | 337 (48.8)          | 1.00                                   | 1.00                                 | 0.103                               |
|                                                               | 5.0–15.0                       | 79 (24.7)        | 229 (33.2)          | 0.58 (0.42, 0.79)                      | 0.58 (0.39, 0.88)                    |                                     |
|                                                               | > 15.0                         | 40 (12.5)        | 124 (18.0)          | 0.54 (0.36, 0.80)                      | 0.81 (0.47, 1.40)                    |                                     |

OR (odds ratio); CI (confidence interval). <sup>a</sup> Women who reported drinking any municipal tap water during one month preconception to one month post-conception for neural tube defects, and one month preconception through the first trimester for limb, oral cleft and congenital heart defects.

<sup>b</sup> For neural tube defects, nitrate in drinking water one month preconception to one month post-conception was estimated. For limb, oral cleft and congenital heart defects, nitrate in drinking water during one month preconception through the first trimester was estimated. <sup>c</sup> Crude and adjusted odds ratio include only cases and controls with complete information for covariates. <sup>d</sup> Adjusted for maternal race/ethnicity, education, study center and folic acid supplementation during period one month before through one month post-conception. <sup>e</sup> Adjusted for maternal race/ethnicity, education, age, multivitamin use during the first trimester, and study center. <sup>f</sup> Isolated defect. <sup>g</sup> Adjusted for maternal race/ethnicity, education, age, folic acid supplementation during the first trimester, maternal smoking, and study center. <sup>h</sup> Adjusted for maternal race/ethnicity, education, multivitamin use during the first trimester, maternal smoking, and study center.

**Supplemental Material, Table S3.** Associations between nitrosatable drug use (versus no use) and birth defects according to estimated nitrate intake from drinking water during early pregnancy

| Congenital malformation                                       | Nitrate <sup>a</sup><br>(mg/day) | Nitrosatable drug exposure<br>during the first trimester |    |          |     | Unadjusted OR <sup>b</sup><br>(95% CI) | Adjusted OR <sup>b</sup><br>(95% CI) | Attributable<br>proportion due to<br>interaction | <i>p</i> -value for<br>multiplicative<br>interaction term |
|---------------------------------------------------------------|----------------------------------|----------------------------------------------------------|----|----------|-----|----------------------------------------|--------------------------------------|--------------------------------------------------|-----------------------------------------------------------|
|                                                               |                                  | Cases                                                    |    | Controls |     |                                        |                                      |                                                  |                                                           |
|                                                               |                                  | Yes                                                      | No | Yes      | No  |                                        |                                      |                                                  |                                                           |
| Any neural tube defect <sup>c</sup>                           | < 0.91                           | 13                                                       | 54 | 37       | 330 | 2.15 (1.07, 4.30)                      | 2.54 (1.20, 5.37)                    | -0.29 (-1.27, 0.69)                              | 0.283                                                     |
|                                                               | 0.91 – 4.99                      | 11                                                       | 54 | 59       | 301 | 1.04 (0.51, 2.11)                      | 1.26 (0.60, 2.65)                    |                                                  |                                                           |
|                                                               | ≥ 5.0                            | 20                                                       | 75 | 61       | 313 | 1.37 (0.78, 2.41)                      | 1.20 (0.66, 2.19)                    |                                                  |                                                           |
| Any limb deficiency <sup>d,e</sup>                            | < 1.0                            | 3                                                        | 19 | 66       | 297 | 0.71 (0.20, 2.47)                      | 0.72 (0.19, 2.70)                    | 0.32 (-0.40, 1.03)                               | 0.440                                                     |
|                                                               | 1.0 – 5.41                       | 8                                                        | 20 | 79       | 280 | 1.42 (0.60, 3.34)                      | 1.12 (0.45, 2.79)                    |                                                  |                                                           |
|                                                               | ≥ 5.42                           | 12                                                       | 29 | 86       | 276 | 1.33 (0.65, 2.71)                      | 1.20 (0.57, 2.53)                    |                                                  |                                                           |
| Cleft lip with or without<br>cleft palate <sup>e,f</sup>      | < 1.0                            | 16                                                       | 75 | 66       | 297 | 0.96 (0.53, 1.75)                      | 0.97 (0.52, 1.84)                    | -0.003 (-0.69, 0.68)                             | 0.988                                                     |
|                                                               | 1.0 – 5.41                       | 20                                                       | 66 | 78       | 280 | 1.09 (0.62, 1.90)                      | 0.99 (0.54, 1.80)                    |                                                  |                                                           |
|                                                               | ≥ 5.42                           | 28                                                       | 88 | 85       | 276 | 1.03 (0.63, 1.69)                      | 1.01 (0.60, 1.69)                    |                                                  |                                                           |
| Cleft palate <sup>e,f</sup>                                   | < 1.0                            | 10                                                       | 18 | 66       | 297 | 2.50 (1.10, 5.66)                      | 2.89 (1.15, 7.25)                    | -0.24 (-1.17, 0.69)                              | 0.391                                                     |
|                                                               | 1.0 – 5.41                       | 5                                                        | 26 | 78       | 280 | 0.69 (0.26, 1.86)                      | 0.60 (0.20, 1.78)                    |                                                  |                                                           |
|                                                               | ≥ 5.42                           | 16                                                       | 38 | 85       | 276 | 1.37 (0.73, 2.57)                      | 1.31 (0.67, 2.54)                    |                                                  |                                                           |
| Conotruncal heart defect <sup>e,g</sup>                       | < 1.0                            | 12                                                       | 45 | 66       | 297 | 1.20 (0.60, 2.39)                      | 1.39 (0.66, 2.91)                    | -0.88 (-2.56, 0.80)                              | 0.182                                                     |
|                                                               | 1.0 – 5.41                       | 7                                                        | 32 | 79       | 280 | 0.78 (0.33, 1.82)                      | 0.86 (0.35, 2.13)                    |                                                  |                                                           |
|                                                               | ≥ 5.42                           | 10                                                       | 52 | 86       | 276 | 0.62 (0.30, 1.27)                      | 0.59 (0.28, 1.23)                    |                                                  |                                                           |
| Right ventricular outflow<br>tract obstruction <sup>e,g</sup> | < 1.0                            | 8                                                        | 27 | 66       | 297 | 1.33 (0.58, 3.07)                      | 1.36 (0.56, 3.31)                    | -1.24 (-3.32, 0.84)                              | 0.095                                                     |
|                                                               | 1.0 – 5.41                       | 10                                                       | 21 | 79       | 280 | 1.69 (0.76, 3.73)                      | 2.25 (0.94, 5.40)                    |                                                  |                                                           |
|                                                               | ≥ 5.42                           | 8                                                        | 45 | 86       | 276 | 0.57 (0.26, 1.26)                      | 0.56 (0.25, 1.28)                    |                                                  |                                                           |
| Left ventricular outflow<br>tract obstruction <sup>e,g</sup>  | < 1.0                            | 9                                                        | 35 | 66       | 297 | 1.16 (0.53, 2.52)                      | 1.06 (0.47, 2.39)                    | -0.15 (-1.29, 0.99)                              | 0.892                                                     |
|                                                               | 1.0 – 5.41                       | 11                                                       | 45 | 79       | 280 | 0.87 (0.43, 1.75)                      | 0.81 (0.39, 1.69)                    |                                                  |                                                           |
|                                                               | ≥ 5.42                           | 12                                                       | 39 | 86       | 276 | 0.99 (0.49, 1.97)                      | 0.83 (0.41, 1.70)                    |                                                  |                                                           |

| Congenital malformation            | Nitrate <sup>a</sup><br>(mg/day) | Nitrosatable drug exposure<br>during the first trimester |     |          |     | Unadjusted OR <sup>b</sup><br>(95% CI) | Adjusted OR <sup>b</sup><br>(95% CI) | Attributable<br>proportion due to<br>interaction | <i>p</i> -value for<br>multiplicative<br>interaction term |
|------------------------------------|----------------------------------|----------------------------------------------------------|-----|----------|-----|----------------------------------------|--------------------------------------|--------------------------------------------------|-----------------------------------------------------------|
|                                    |                                  | Cases                                                    |     | Controls |     |                                        |                                      |                                                  |                                                           |
|                                    |                                  | Yes                                                      | No  | Yes      | No  |                                        |                                      |                                                  |                                                           |
| Septal heart defect <sup>c,g</sup> | < 1.0                            | 47                                                       | 154 | 66       | 297 | 1.37 (0.90, 2.09)                      | 1.53 (0.97, 2.42)                    |                                                  |                                                           |
|                                    | 1.0 – 5.41                       | 43                                                       | 157 | 79       | 280 | 0.97 (0.64, 1.48)                      | 1.03 (0.66, 1.61)                    |                                                  |                                                           |
|                                    | ≥ 5.42                           | 41                                                       | 110 | 86       | 276 | 1.20 (0.78, 1.84)                      | 1.19 (0.76, 1.88)                    | -0.20 (-0.93, 0.53)                              | 0.655                                                     |

OR (odds ratio); CI (confidence interval).

<sup>a</sup>For neural tube defects, water nitrate intake one month preconception to one month post-conception was estimated. For limb, oral cleft and congenital heart defects, water nitrate intake one month preconception through the first trimester was estimated.

<sup>b</sup>Crude and adjusted odds ratio (OR) include only cases and controls with complete information for covariates.

<sup>c</sup>Adjusted for maternal race/ethnicity, education, study center and folic acid supplementation.

<sup>d</sup>Adjusted for maternal race/ethnicity, education, age, multivitamin supplementation, and study center.

<sup>e</sup>Isolated defect.

<sup>f</sup>Adjusted for maternal race/ethnicity, education, age, folic acid supplementation, smoking, and study center.

<sup>g</sup>Adjusted for maternal race/ethnicity, education, multivitamin supplementation, smoking, and study center.

**Supplemental Material, Table S4.** Associations between nitrosatable drug use (versus no use) and birth defects according to estimated total nitrite intake from diet and drinking water during early pregnancy

| Type of birth defect                                     | Total nitrite intake <sup>a</sup><br>(mg/day) | Nitrosatable drug exposure during the first trimester |     |          |     | Unadjusted OR <sup>b</sup><br>(95% CI) | Adjusted OR <sup>b</sup><br>(95% CI) | Attributable proportion due to interaction <sup>c</sup> | <i>p</i> -value for multiplicative interaction term |
|----------------------------------------------------------|-----------------------------------------------|-------------------------------------------------------|-----|----------|-----|----------------------------------------|--------------------------------------|---------------------------------------------------------|-----------------------------------------------------|
|                                                          |                                               | Cases                                                 |     | Controls |     |                                        |                                      |                                                         |                                                     |
|                                                          |                                               | Yes                                                   | No  | Yes      | No  |                                        |                                      |                                                         |                                                     |
| Any neural tube defect <sup>d</sup>                      | ≤ 4.74                                        | 27                                                    | 112 | 111      | 597 | 1.30 (0.81, 2.07)                      | 1.41 (0.87, 2.29)                    | 0.31 (-0.21, 0.83)                                      | 0.396                                               |
|                                                          | > 4.74                                        | 16                                                    | 67  | 41       | 313 | 1.82 (0.97, 3.44)                      | 1.76 (0.90, 3.43)                    |                                                         |                                                     |
| Cleft lip without cleft palate <sup>e</sup>              | ≤ 4.78                                        | 14                                                    | 52  | 159      | 536 | 0.91 (0.49, 1.68)                      | 0.80 (0.42, 1.52)                    | 0.60 (0.15, 1.05)                                       | 0.074                                               |
|                                                          | > 4.78                                        | 13                                                    | 23  | 65       | 284 | 2.47 (1.19, 5.13)                      | 2.01 (0.90, 4.48)                    |                                                         |                                                     |
| Cleft lip with cleft palate <sup>e</sup>                 | ≤ 4.78                                        | 29                                                    | 134 | 159      | 536 | 0.73 (0.47, 1.13)                      | 0.76 (0.48, 1.21)                    | 0.34 (-0.41, 1.09)                                      | 0.533                                               |
|                                                          | > 4.78                                        | 12                                                    | 52  | 65       | 284 | 1.01 (0.51, 2.00)                      | 1.13 (0.54, 2.37)                    |                                                         |                                                     |
| Cleft palate <sup>e</sup>                                | ≤ 4.78                                        | 20                                                    | 69  | 159      | 536 | 0.98 (0.58, 1.66)                      | 0.95 (0.55, 1.64)                    | 0.63 (0.32, 0.95) <sup>h</sup>                          | 0.019                                               |
|                                                          | > 4.78                                        | 19                                                    | 30  | 65       | 284 | 2.77 (1.47, 5.22)                      | 2.51 (1.24, 5.06)                    |                                                         |                                                     |
| Any limb deficiency <sup>f</sup>                         | ≤ 4.78                                        | 14                                                    | 52  | 161      | 537 | 0.90 (0.49, 1.66)                      | 1.00 (0.53, 1.89)                    | 0.47 (0.05, 0.89)                                       | 0.154                                               |
|                                                          | > 4.78                                        | 14                                                    | 35  | 65       | 283 | 1.74 (0.89, 3.42)                      | 1.64 (0.80, 3.35)                    |                                                         |                                                     |
| Conotruncal heart defect <sup>g</sup>                    | ≤ 4.78                                        | 33                                                    | 114 | 161      | 537 | 0.97 (0.63, 1.48)                      | 0.98 (0.64, 1.52)                    | -0.13 (-1.02, 0.76)                                     | 0.769                                               |
|                                                          | > 4.78                                        | 13                                                    | 64  | 65       | 283 | 0.88 (0.46, 1.70)                      | 0.80 (0.40, 1.61)                    |                                                         |                                                     |
| Right ventricular outflow tract obstruction <sup>g</sup> | ≤ 4.78                                        | 31                                                    | 88  | 161      | 537 | 1.17 (0.75, 1.83)                      | 1.15 (0.72, 1.82)                    | -0.26 (-1.26, 0.74)                                     | 0.565                                               |
|                                                          | > 4.78                                        | 11                                                    | 54  | 65       | 283 | 0.89 (0.44, 1.79)                      | 0.83 (0.40, 1.74)                    |                                                         |                                                     |
| Left ventricular outflow tract obstruction <sup>g</sup>  | ≤ 4.78                                        | 28                                                    | 109 | 161      | 537 | 0.86 (0.55, 1.35)                      | 0.82 (0.52, 1.30)                    | 0.19 (-0.47, 0.85)                                      | 0.578                                               |
|                                                          | > 4.78                                        | 14                                                    | 56  | 65       | 283 | 1.09 (0.57, 2.07)                      | 0.96 (0.49, 1.92)                    |                                                         |                                                     |
| Septal heart defect <sup>g</sup>                         | ≤ 4.78                                        | 125                                                   | 373 | 161      | 537 | 1.12 (0.85, 1.46)                      | 1.19 (0.90, 1.58)                    |                                                         |                                                     |



| Type of birth defect                        | Total nitrite intake <sup>a</sup><br>(mg/day) | Nitrosatable drug exposure during the first trimester |     |          |     | Unadjusted OR <sup>b</sup><br>(95% CI) | Adjusted OR <sup>b</sup><br>(95% CI) | Attributable proportion due to interaction <sup>c</sup> | <i>p</i> -value for multiplicative interaction term |
|---------------------------------------------|-----------------------------------------------|-------------------------------------------------------|-----|----------|-----|----------------------------------------|--------------------------------------|---------------------------------------------------------|-----------------------------------------------------|
|                                             |                                               | Cases                                                 |     | Controls |     |                                        |                                      |                                                         |                                                     |
|                                             |                                               | Yes                                                   | No  | Yes      | No  |                                        |                                      |                                                         |                                                     |
|                                             | > 4.78                                        | 63                                                    | 244 | 65       | 283 | 1.12 (0.76, 1.65)                      | 1.09 (0.72, 1.64)                    |                                                         |                                                     |
| Atrioventricular septal defect <sup>g</sup> | ≤ 4.78                                        | 8                                                     | 13  | 161      | 537 | 2.05 (0.84, 5.04)                      | 1.93 (0.76, 4.87)                    | 0.03 (-0.42, 0.47)                                      | 0.955                                               |
|                                             | > 4.78                                        | 7                                                     | 6   | 65       | 283 | 5.08 (1.65, 15.6)                      | 5.10 (1.40, 18.6)                    |                                                         |                                                     |
| Single ventricle <sup>g</sup>               | ≤ 4.78                                        | 5                                                     | 24  | 161      | 537 | 0.69 (0.26, 1.85)                      | 0.74 (0.27, 2.02)                    | 0.50 (-0.17, 1.16)                                      | 0.230                                               |
|                                             | > 4.78                                        | 7                                                     | 11  | 65       | 283 | 2.77 (1.03, 7.42)                      | 3.25 (1.13, 9.31)                    |                                                         |                                                     |
|                                             |                                               |                                                       |     |          |     |                                        |                                      | 0.75 (0.32, 1.18)                                       | 0.063                                               |

OR (odds ratio); CI (confidence interval).

<sup>a</sup>Total nitrite intake = dietary nitrite intake + 5% (dietary nitrate intake + nitrate from drinking water). Contribution from nitrate in drinking water estimated for one month prior through one month postconception for NTDs and one month prior to conception through the first trimester for the other congenital malformations. <sup>b</sup>Crude and adjusted odds ratio include only cases and controls with complete information for covariates and calorie intake between 500-5000 kcal. <sup>c</sup>Interaction assessed on dichotomized categories of total nitrite intake: highest tertile versus the two lower tertiles of intake combined. <sup>d</sup>Adjusted for maternal race/ethnicity, education, study center, folic acid supplementation during period one month before through one month post conception, and caloric intake. <sup>e</sup>Adjusted for maternal race/ethnicity, education, age, folic acid supplementation during the first trimester, maternal smoking, study center, and caloric intake. <sup>f</sup>Adjusted for maternal race/ethnicity, education, age, multivitamin use during the first trimester, study center, and caloric intake. <sup>g</sup>Adjusted for maternal race/ethnicity, education, multivitamin use during the first trimester, maternal smoking, study center, and caloric intake. <sup>h</sup>Significant relative excess risk due to interaction (RERI) 1.60 (0.11, 3.09) was observed for cleft palate.
